# Supplementary material for: Cell cycle-regulated multi-site phosphorylation of Neurogenin 2 coordinates cell cycling with differentiation during neurogenesis
Source: Oxford University Press journal article supplement (doi:10.1242/dev.067900), 2011-08-19
Supplement: dev067900tables1.pdf [file dev067900tables1.pdf]

**Table S1. Primers for quantitative real-time PCR**

| Primer             | Sequence (5' to 3')      |
|--------------------|--------------------------|
| m_βIII-tubulin Fwd | TCCGCCTGCCTTTTCGTCT      |
| m_βIII-tubulin rev | CCAGTTGTTGCCAGCACCAC     |
| xNeural-β-tub_Fwd  | ACACGGCATTGATCCTACAG     |
| xNeural-β-tub_rev  | AGTCCTTCGGTGTAATGAC      |
| mBactin Fwd        | CAGGGTGTGATGGTGGGAATG    |
| mBactin rev        | ATGGCTGGGGTGTTGAAGGTC    |
| mGAPDH Fwd         | GAAGGTCGGTGTGAACGGATTT   |
| mGAPDH rev         | CATTTGATGTTAGTGGGGTCTCGC |
| xODC_Fwd           | GAATCACCCGAATGCAAAGC     |
| xODC_rev           | CCACTGCCAACATGGAAACTC    |
