# Supplementary figures and images for: Cell cycle-regulated multi-site phosphorylation of Neurogenin 2 coordinates cell cycling with differentiation during neurogenesis
Source: Oxford University Press journal article supplement (doi:10.1242/dev.067900), 2011-08-19

# A

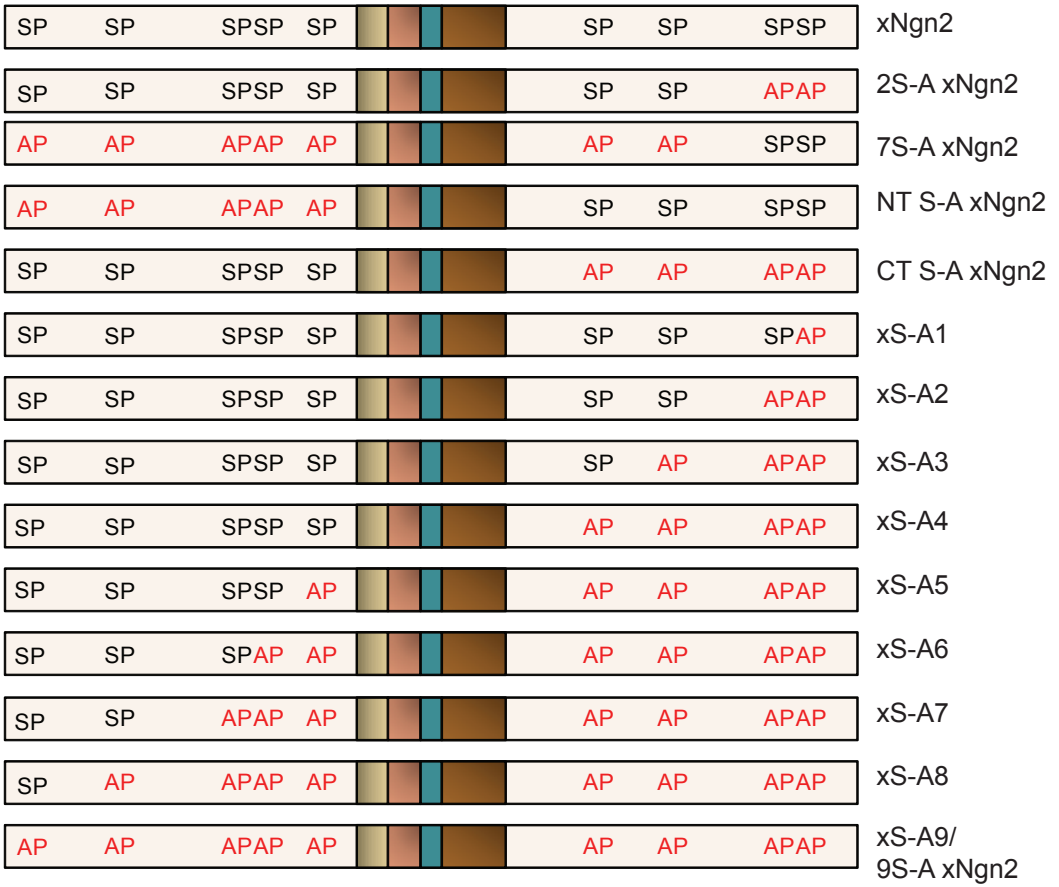

# B

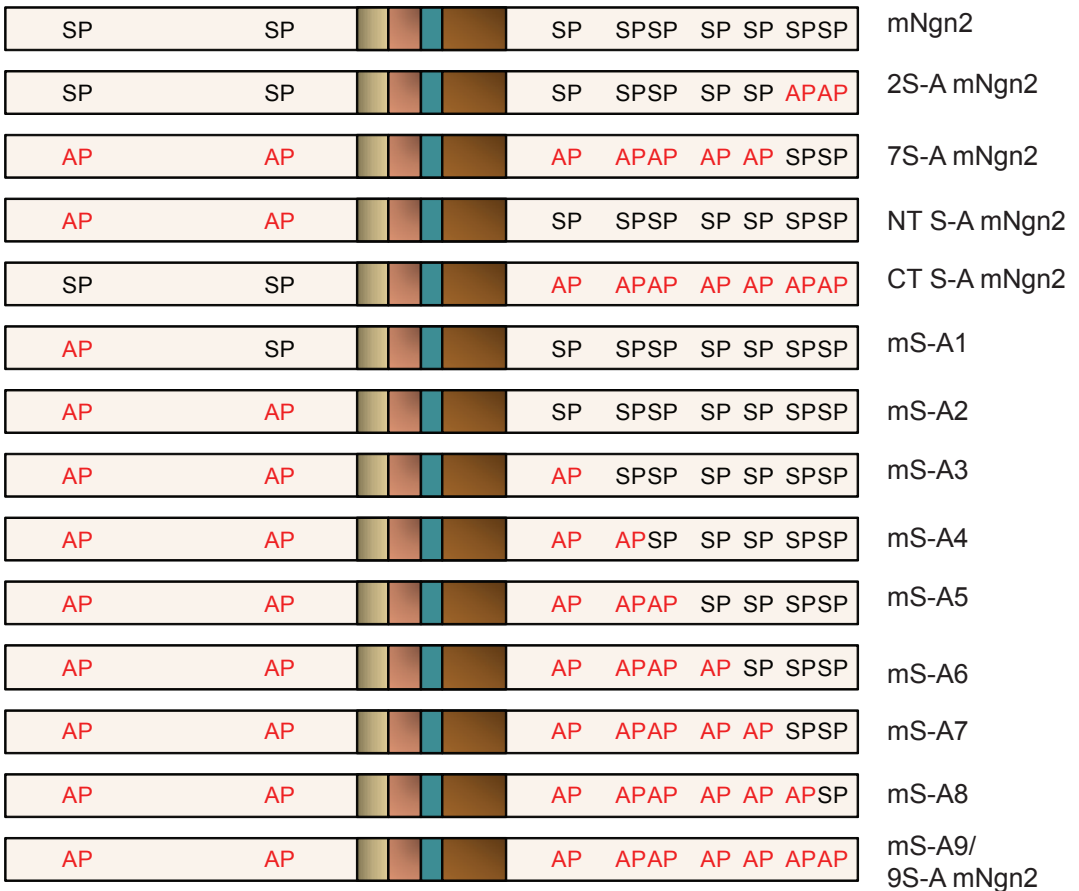

Supplement: dev067900figs1.pdf [file dev067900figs1.pdf]

|                 | <u>xNgn2</u> |   |   | <u>9S-A xNgn2</u> |   |   | <u>CT S-A xNgn2</u> |   |   | <u>NT S-A xNgn2</u> |   |   |
|-----------------|--------------|---|---|-------------------|---|---|---------------------|---|---|---------------------|---|---|
| Mitotic extract | -            | + | + | -                 | + | + | -                   | + | + | -                   | + | + |
| BIO             | -            | - | + | -                 | - | + | -                   | - | + | -                   | - | + |

36 kDa —

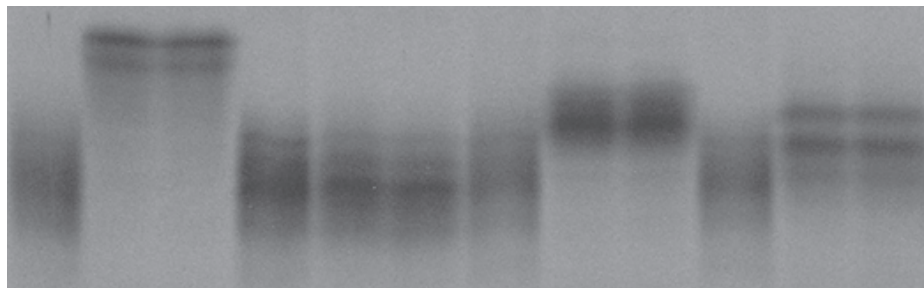

Supplement: dev067900figs2.pdf [file dev067900figs2.pdf]

|                          | xNgn2 |   |   |   | 9S-A xNgn2 |   |   |   |
|--------------------------|-------|---|---|---|------------|---|---|---|
| Roscovitine (50 $\mu$ M) | +     | - | - | - | +          | - | - | - |
| DMSO                     | -     | + | - | - | -          | + | - | - |
| $\lambda$ P'ase          | -     | - | + | - | -          | - | + | - |
| Phosphatase buffer       | -     | - | + | + | -          | - | - | + |

36kDa —

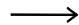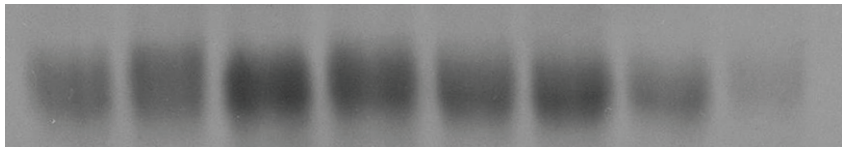

Supplement: dev067900figs3.pdf [file dev067900figs3.pdf]

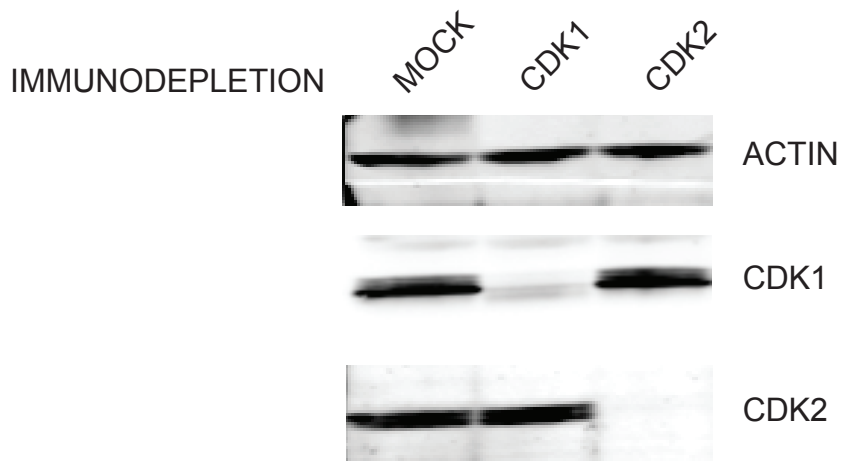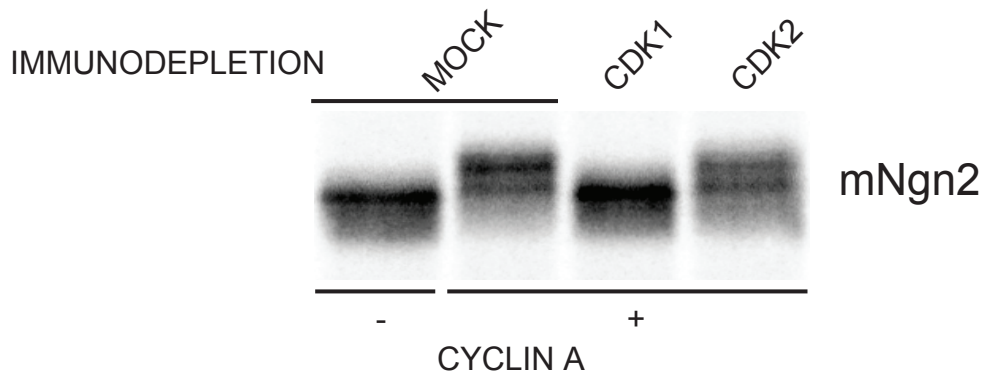

Supplement: dev067900figs4.pdf [file dev067900figs4.pdf]

A

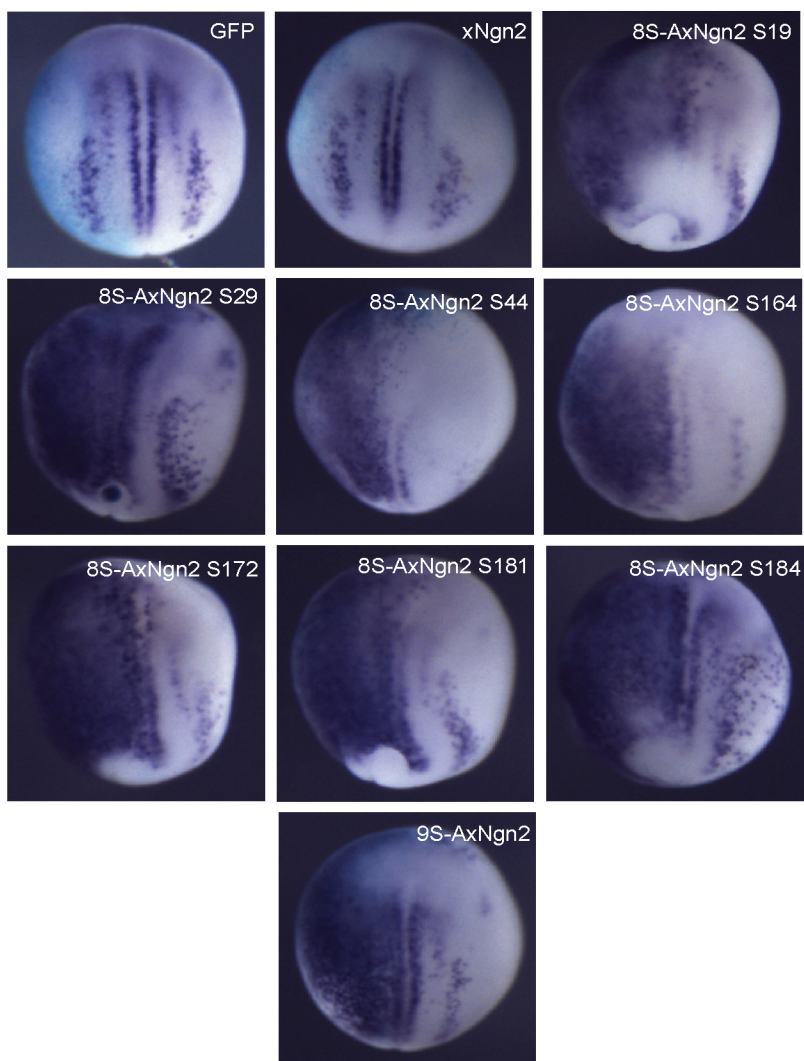

B

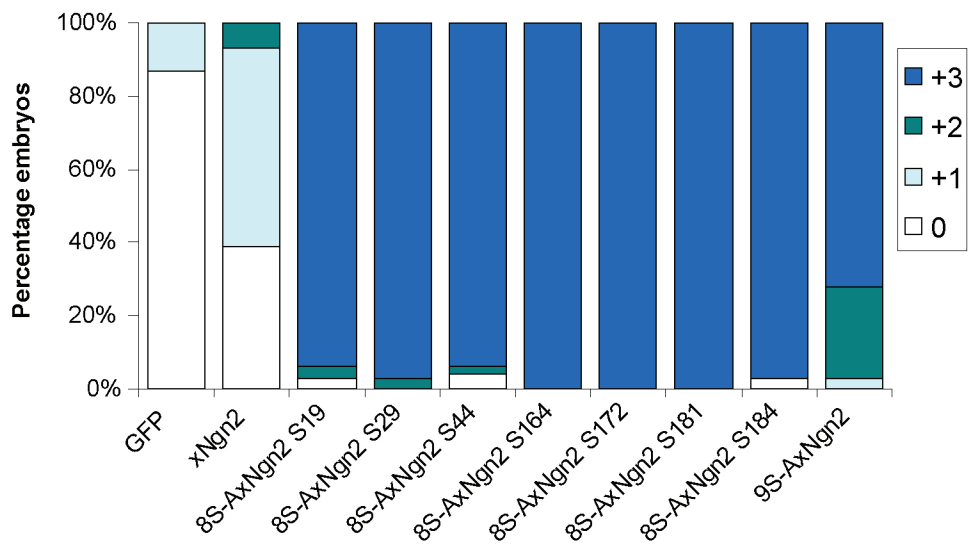

Supplement: dev067900figs5.pdf [file dev067900figs5.pdf]

**A**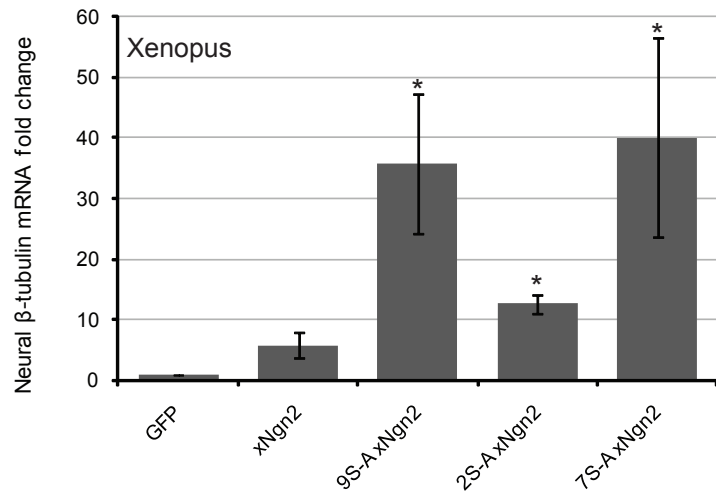**B**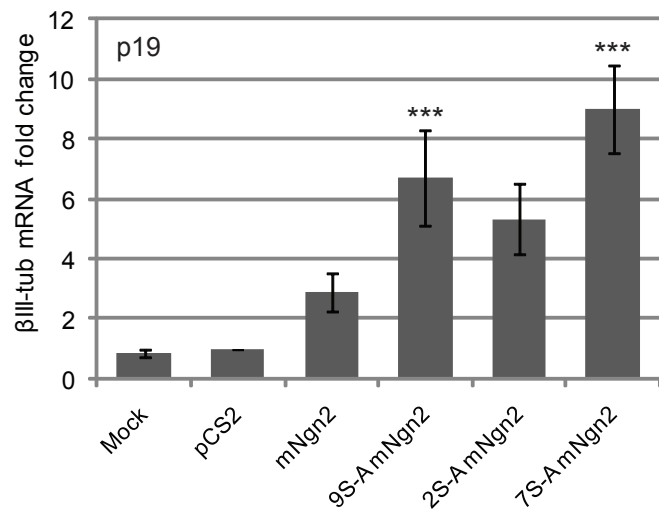

Supplement: dev067900figs6.pdf [file dev067900figs6.pdf]

**A**

|                  |   |   |   |   |   |   |   |   |   |   |   |   |   |   |   |   |
|------------------|---|---|---|---|---|---|---|---|---|---|---|---|---|---|---|---|
| SP sites mutated | - | 0 | 9 | - | - | - | 0 | 1 | 2 | 3 | 4 | 5 | 6 | 7 | 8 | 9 |
| Extract          | - | - | - | - | + | + | + | + | + | + | + | + | + | + | + | + |
| E12              | - | + | + | + | - | + | + | + | + | + | + | + | + | + | + | + |

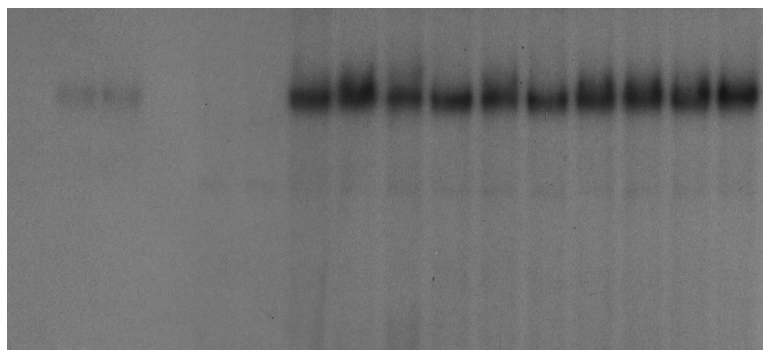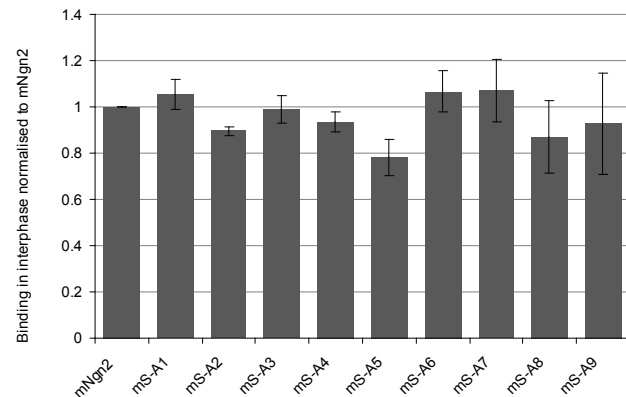**B**

|                  |   |   |   |   |   |   |   |   |   |   |   |   |   |   |   |   |
|------------------|---|---|---|---|---|---|---|---|---|---|---|---|---|---|---|---|
| SP sites mutated | - | 0 | 9 | - | - | - | 0 | 1 | 2 | 3 | 4 | 5 | 6 | 7 | 8 | 9 |
| Extract          | - | - | - | - | + | + | + | + | + | + | + | + | + | + | + | + |
| E12              | - | + | + | + | - | + | + | + | + | + | + | + | + | + | + | + |

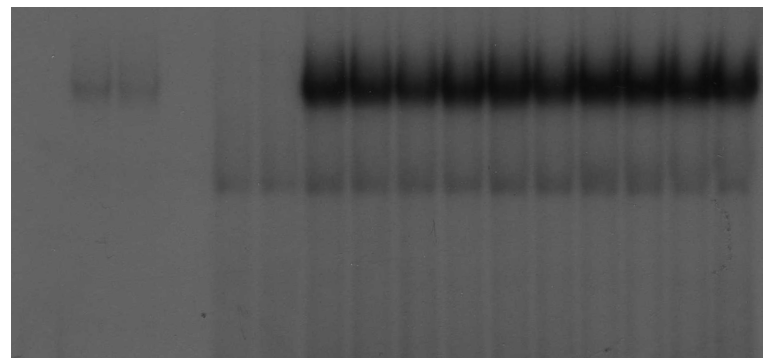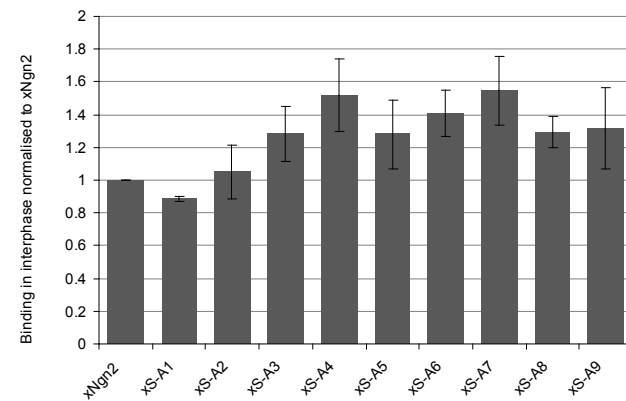

Supplement: dev067900figs7.pdf [file dev067900figs7.pdf]

## Increase in neurogenesis

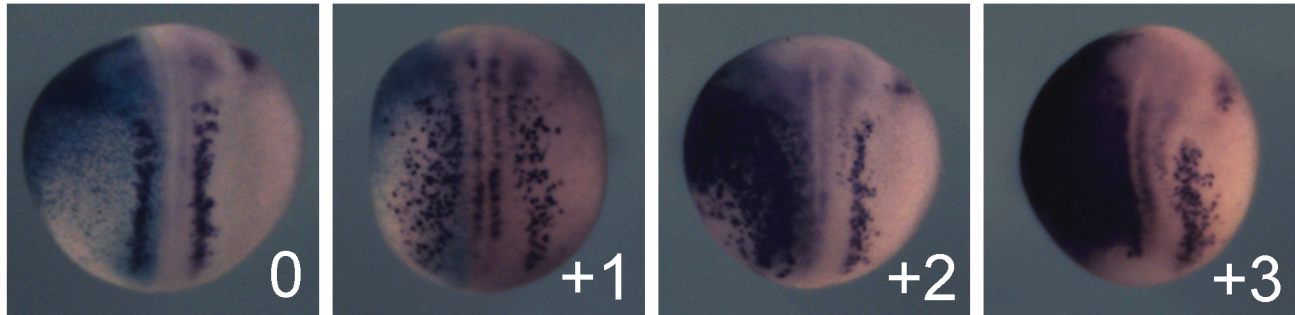

## Decrease in neurogenesis

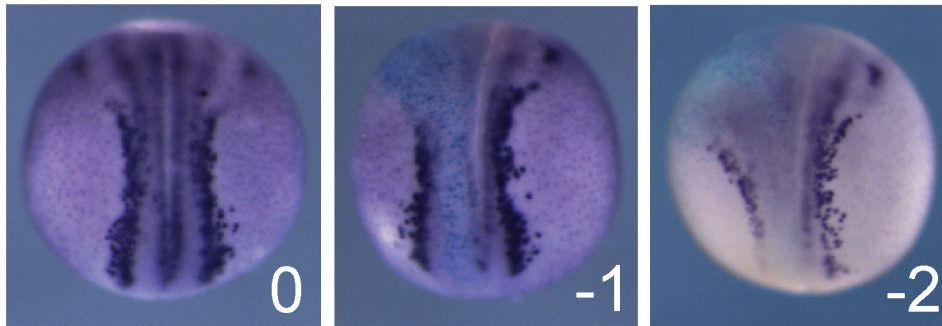

Supplement: dev067900figs8.pdf [file dev067900figs8.pdf]
